# Supplementary material for: ECMO in Myocardial Infarction-Associated Cardiogenic Shock: Blood Biomarkers as Predictors of Mortality
Source: MDPI journal article supplement (doi:10.3390/diagnostics13243683), 2023-12-17
Supplement: s1 [file s1]

# ECMO in Myocardial Infarction-Associated Cardiogenic Shock: Blood Biomarkers as Predictors of Mortality

## Supplementary material

### Contents:

**Table S1.** STROBE Statement - Checklist of items that should be included in reports of cohort studies

**Table S2.** Identification of risk factors for death: univariate analysis (n = 188)

**Table S3.** Identification of risk factors for death: multivariate analysis (Procalcitonin on day three; n = 188)

**Table S4.** Identification of risk factors for death: multivariate analysis (Procalcitonin on day four; n = 188)

**Table S5.** Identification of risk factors for death: multivariate analysis (Procalcitonin on day five; n = 188)

**Table S1.** STROBE Statement - Checklist of items that should be included in reports of cohort studies

| No.                       | Item                         | Recommendation                                                                                                                                                                                    | Page |
|---------------------------|------------------------------|---------------------------------------------------------------------------------------------------------------------------------------------------------------------------------------------------|------|
| <b>Title and abstract</b> |                              |                                                                                                                                                                                                   |      |
| 1                         |                              | (a) Indicate the study's design with a commonly used term in the title or the abstract                                                                                                            | 1    |
|                           |                              | (b) Provide in the abstract an informative and balanced summary of what was done and what was found                                                                                               | 1    |
| <b>Introduction</b>       |                              |                                                                                                                                                                                                   |      |
| 2                         | Background/rationale         | Explain the scientific background and rationale for the investigation being reported                                                                                                              | 1-2  |
| 3                         | Objectives                   | State specific objectives, including any prespecified hypotheses                                                                                                                                  | 2    |
| <b>Methods</b>            |                              |                                                                                                                                                                                                   |      |
| 4                         | Study design                 | Present key elements of study design early in the paper                                                                                                                                           | 2-3  |
| 5                         | Setting                      | Describe the setting, locations, and relevant dates, including periods of recruitment, exposure, follow-up, and data collection                                                                   | 2-3  |
| 6                         |                              | (a) Give the eligibility criteria, and the sources and methods of selection of participants. Describe methods of follow-up                                                                        | 2-3  |
|                           | Participants                 | (b) For matched studies, give matching criteria and number of exposed and unexposed                                                                                                               | 2-3  |
| 7                         | Variables                    | Clearly define all outcomes, exposures, predictors, potential confounders, and effect modifiers. Give diagnostic criteria, if applicable                                                          | 2-3  |
| 8*                        | Data sources/<br>measurement | For each variable of interest, give sources of data and details of methods of assessment (measurement). Describe comparability of assessment methods if there is more than one group              | 2-3  |
| 9                         | Bias                         | Describe any efforts to address potential sources of bias                                                                                                                                         | 2-3  |
| 10                        | Study size                   | Explain how the study size was arrived at                                                                                                                                                         | -    |
| 11                        | Quantitative<br>variables    | Explain how quantitative variables were handled in the analyses. If applicable, describe which groupings were chosen and why                                                                      | -    |
| 12                        |                              | (a) Describe all statistical methods, including those used to control for confounding                                                                                                             | 3    |
|                           |                              | (b) Describe any methods used to examine subgroups and interactions                                                                                                                               | 3    |
|                           |                              | (c) Explain how missing data were addressed                                                                                                                                                       | -    |
|                           |                              | (d) If applicable, explain how loss to follow-up was addressed                                                                                                                                    | -    |
|                           | Statistical methods          | (e) Describe any sensitivity analyses                                                                                                                                                             | -    |
| <b>Results</b>            |                              |                                                                                                                                                                                                   |      |
| 13*                       |                              | (a) Report numbers of individuals at each stage of study—eg numbers potentially eligible, examined for eligibility, confirmed eligible, included in the study, completing follow-up, and analysed | 3-4  |
|                           |                              | (b) Give reasons for non-participation at each stage                                                                                                                                              | 3-4  |
|                           | Participants                 | (c) Consider use of a flow diagram                                                                                                                                                                | -    |

|                          |                  |                                                                                                                                                                                                              |     |
|--------------------------|------------------|--------------------------------------------------------------------------------------------------------------------------------------------------------------------------------------------------------------|-----|
| 14*                      |                  | (a) Give characteristics of study participants (eg demographic, clinical, social) and information on exposures and potential confounders                                                                     | 3-5 |
|                          |                  | (b) Indicate number of participants with missing data for each variable of interest                                                                                                                          | -   |
|                          | Descriptive data | (c) Summarise follow-up time (eg, average and total amount)                                                                                                                                                  | 3-7 |
| 15*                      | Outcome data     | Report numbers of outcome events or summary measures over time                                                                                                                                               | 3-7 |
| 16                       |                  | (a) Give unadjusted estimates and, if applicable, confounder-adjusted estimates and their precision (eg, 95% confidence interval). Make clear which confounders were adjusted for and why they were included | 3-7 |
|                          |                  | (b) Report category boundaries when continuous variables were categorized                                                                                                                                    | 3-7 |
|                          | Main results     | (c) If relevant, consider translating estimates of relative risk into absolute risk for a meaningful time period                                                                                             |     |
| 17                       | Other analyses   | Report other analyses done—eg analyses of subgroups and interactions, and sensitivity analyses                                                                                                               | 4-7 |
| <b>Discussion</b>        |                  |                                                                                                                                                                                                              |     |
| 18                       | Key results      | Summarise key results with reference to study objectives                                                                                                                                                     | 7-8 |
| 19                       | Limitations      | Discuss limitations of the study, taking into account sources of potential bias or imprecision. Discuss both direction and magnitude of any potential bias                                                   | 8   |
| 20                       | Interpretation   | Give a cautious overall interpretation of results considering objectives, limitations, multiplicity of analyses, results from similar studies, and other relevant evidence                                   | 8   |
| 21                       | Generalisability | Discuss the generalisability (external validity) of the study results                                                                                                                                        | 8   |
| <b>Other information</b> |                  |                                                                                                                                                                                                              |     |
| 22                       | Funding          | Give the source of funding and the role of the funders for the present study and, if applicable, for the original study on which the present article is based                                                | 9   |

\*Give information separately for exposed and unexposed groups.

**Table S2.** Identification of risk factors for death: univariate analysis (selected parameters; n = 188)

| Variable                   | B-coefficient | P-value | HR                | 95% Confidence interval |       |
|----------------------------|---------------|---------|-------------------|-------------------------|-------|
|                            |               |         |                   | Lower                   | Upper |
| Procalcitonin on day two   | 0.008         | 0.006   | 1.01 <sup>a</sup> | 1.00                    | 1.01  |
| Procalcitonin on day three | 0.008         | 0.002   | 1.01              | 1.00                    | 1.01  |
| Procalcitonin on day four  | 0.011         | <0.001  | 1.01              | 1.01                    | 1.02  |
| Procalcitonin on day five  | 0.016         | 0.001   | 1.02              | 1.01                    | 1.03  |
| Procalcitonin on day six   | 0.016         | 0.091   | 1.02              | 1.00                    | 1.04  |
| Procalcitonin on day seven | 0.028         | 0.014   | 1.03              | 1.01                    | 1.05  |
| Fibrinogen on day two      | - 0.002       | 0.041   | 1.00              | 1.00                    | 1.00  |
| Fibrinogen on day three    | - 0.004       | 0.002   | 1.00              | 1.00                    | 1.00  |
| Fibrinogen on day four     | - 0.002       | 0.072   | 1.00              | 1.00                    | 1.00  |
| Fibrinogen on day five     | - 0.001       | 0.237   | 1.00              | 1.00                    | 1.00  |
| Fibrinogen on day six      | - 0.002       | 0.025   | 1.00              | 1.00                    | 1.00  |
| Fibrinogen on day seven    | - 0.002       | 0.051   | 1.00              | 1.00                    | 1.00  |
| Resuscitation before ECMO  | 0.462         | 0.031   | 1.59              | 1.04                    | 2.41  |
| Haemorrhage                | 0.494         | 0.021   | 1.64              | 1.08                    | 2.50  |
| Arterial thrombosis        | 0.434         | 0.078   | 1.54              | 0.95                    | 2.50  |
| SAPS III score             | 0.032         | <0.001  | 1.03              | 1.02                    | 1.05  |

<sup>a</sup>For every increase in one unit of measurement, hazard ratio increased by 1%. Abbreviations: ECMO, extracorporeal membrane oxygenation; CI, confidence Intervals; HR, hazard ratio; SAPS III: simplified acute physiology score III

**Table S3.** Identification of risk factors for death: multivariate analysis (Procalcitonin on day three; n = 188)

| Variable                             | B-coefficient | P-value | HR*   | 95% Confidence interval |       |
|--------------------------------------|---------------|---------|-------|-------------------------|-------|
|                                      |               |         |       | Lower                   | Upper |
| Procalcitonin                        | 0.007         | 0.005   | 1.008 | 1.002                   | 1.013 |
| Bleeding event during or after ECMO  | 0.541         | 0.036   | 1.718 | 1.036                   | 2.849 |
| Resuscitation before ECMO initiation | 0.113         | 0.678   | 1.120 | 0.656                   | 1.913 |

\*For every increase in one unit of measurement, hazard ratio increased by 1%. Model values for Procalcitonin for day four. Abbreviations: ECMO, extracorporeal membrane oxygenation; CI, confidence Intervals; HR, hazard ratio.

**Table S4.** Identification of risk factors for death: multivariate analysis (Procalcitonin on day four; n = 188)

| Variable                             | B-coefficient | P-value | HR*   | 95% Confidence interval |       |
|--------------------------------------|---------------|---------|-------|-------------------------|-------|
|                                      |               |         |       | Lower                   | Upper |
| Procalcitonin                        | 0.009         | 0.003   | 1.009 | 1.003                   | 1.016 |
| Bleeding event during or after ECMO  | 0.547         | 0.061   | 1.729 | 0.976                   | 3.062 |
| Resuscitation before ECMO initiation | 0.189         | 0.543   | 1.208 | 0.657                   | 2.219 |

\*For every increase in one unit of measurement, hazard ratio increased by 1%. Model values for Procalcitonin for day four. Abbreviations: ECMO, extracorporeal membrane oxygenation; CI, confidence Intervals; HR, hazard ratio.

**Table S5.** Identification of risk factors for death: multivariate analysis (Procalcitonin on day five; n = 188)

| Variable                             | B-coefficient | P-value | HR*   | 95% Confidence interval |       |
|--------------------------------------|---------------|---------|-------|-------------------------|-------|
|                                      |               |         |       | Lower                   | Upper |
| Procalcitonin                        | 0.013         | 0.011   | 1.013 | 1.003                   | 1.023 |
| Bleeding event during or after ECMO  | 0.703         | 0.017   | 2.021 | 1.131                   | 3.609 |
| Resuscitation before ECMO initiation | 0.273         | 0.365   | 1.313 | 0.728                   | 2.370 |

\*For every increase in one unit of measurement, hazard ratio increased by 1%. Model values for Procalcitonin for day four. Abbreviations: ECMO, extracorporeal membrane oxygenation; CI, confidence Intervals; HR, hazard ratio.
